# Supplementary material for: Teaching clinical communication skills through virtual patient-based learning: an umbrella review of systematic reviews
Source: BMC Med Educ. 2026 May 13;26:1082. doi: 10.1186/s12909-026-09374-6 (PMC13339519; doi:10.1186/s12909-026-09374-6)
Supplement: Supplementary file 1 — Supplementary Material 1. [file 12909_2026_9374_MOESM1_ESM.xlsx]

## Sheet: Tabelle1
Study Details	Participants (Charakteristik/Number)	Ojectives	Description of interventions/phenomena of interest	Comparator Intervention	Search Details	Range (Years) of primary studies	Number of studies included	Types of studies included	Country of origin of included studies	Appraisal Rating	Method of analysis	Synthese	Reported effect Size	Outcome assessed	Secondary Outcomes	Results/findings	Heterogenity	Citation:Aromataris E, Fernandez R, Godfrey C, Holly C, Khalil H, Tungpunkom P. Umbrella Reviews (2020). Aromataris E, Lockwood C, Porritt K, Pilla B, Jordan Z, editors. JBI Manual for Evidence Synthesis. JBI; 2024.
Jensen et al. (18) Systematic review investigating the application of virtual patients in undergraduate psychiatric instruction.	Undergratuade students in psychiatry education from the 1-6th year of studying (n=5563) medical students (n= 2546) nursing students (n=1873) psychology students (n=254) social work students (n=28), students who were enrolled in a psychology course or a social work course (n=87), pharmacy students (n=244), students enrolled in a healthcare-related education (n=531)	Systematic assessment of virtual patient methodologies in undergraduate psychiatric education, evaluating efficacy and contrasting learning results.	Interactive, screen-based, and dynamic virtual patients - Case-based presentation of a virtual patient (n = 17) - Interactive virtual patient scenarios (n = 14) - Standardized virtual patients (n = 10) - Virtual patient videogames (n = 5) - Develop interpersonal and clinical communicative skills. - Enhance medical students' empathic communication. - Provide psychiatric interview training. - Impro…	All types of comparison	PubMed, PsycInfo, CINAHL, and Scopus databases were searched in January 2021	2000-2021	46	Inclusion: - Studies reporting on outcomes related to the students’ knowledge, skills, and/or attitudes following an educational intervention using interactive screen based and dynamic virtual patients articles published between 2000 and january 2021 Exclusion: - Studies examining virtual patient interventions with static multimedia representations - Interventions not developed with an educationa…	Denmark	Critical low (AMSTAR 2)	Categorial and thematic analysis	Narrativ	NR	NR	- General methodological shortcomings - Lack of or poor reporting of the validity of the evaluation instruments - Focused only on learners’ immediate performance - Lack of Follow-up assessments to evaluate performance and retention over time - Lack of patient outcome data - Lack of focus on pediatric patients and young adults with mental illness - Gap regarding transcultural undergraduate psychia…	Virtual patients were associated with higher learning outcomes compared to no intervention, traditional teaching and text-based interventions. However, the results did not indicate any superiority of virtual patients over non- technological simulation. All no-intervention controlled studies resported significant and positive outcomes related to knowledge, skills and attitudes. - In the non-media-…	nr
Lee et al. (19) A systematic review to summarize the design and assessment of virtual patient-based medical communication skills training systems to discover characteristics of successful instances.	Population: Medical Students N = 1120 Year of studying: between the 1st and the 3rd year	Assessment of Vp learning systems, encompassing learning outcomes.	Intervention characteristics: - Virtual patient training in verbal communication and marginally nonverbal skills Instructional interventions: - Pre-session tutorial - By human-generated feedback system - Additional learning and collaborative activities Technical Specifications: - Animated VP`s & static imaging - Interaction from a first-person view - The Vp`s were displayed on a screen or project…	n=5 were studies with comparison -no intervention, alternative training methods (eg, standardized patients), video learning, real patients	Embase, PubMed, OpenGrey, Scopus Searched in December 2018	2006-2018	11	`- Full-text papers wit no language restrictions - No restrictions regarding trainig level, clinical experience, or healthcare specialty - All study design except abstracts, reviews, commentaries, book chapters or editorials were included - All studies investigate the developement of patient- centered communication skills using virtual patients	Republic of korea	Critical low (AMSTAR 2)	nr	Narrativ	NR	Kirkpatrick’s four-level evaluation model (Kirkpatrick DL. Evaluating Training Programs: The Four Levels, 2nd edn. San Francisco, CA: Berrett-Koehler Publishers; 1998.) Communication skills, self-efficacy, empahty - Empathic Communication Coding Scheme (ECCS) - Communication objective structured clinical examination (OSCE) - Author-developed instruments / self-developed tools Measured by : self a…	- Restricted capacity to integrate non-verbal communication competencies - Reliance on effective instructional design rather than technology alone - Absence of stringent assessment methodologies and verified tools - Challenges in quantifying the application of learning to practical healthcare settings and measurable patient outcomes - Enhancing instructional design components inside VP systems - …	Mixed results - Significant improvement in skills and clinical outcomes (n=2) - No differences (n=2) - Favouring control group (SP) to VPs regarding empathy (n=1)	nr
Cho & Kim (20) This comprehensive literature review and meta-analysis examined the impact of VRS on the improvement of communication skills in nursing students.	Population:Nursing students (N=553) year of studying: Between the first and the third year	Examined the impact of VRS on nursing students' communication skills (main) and on knowledge, self-efficacy, critical thinking, teamwork, satisfaction, and confidence (secondary).	VR/Ar simulation (n=6), Metaverse simulation (n=2) - Duration: 10 days to 8 Weeks - Sessions: 2-10 - Session time: 15 Min- 8 hours - Prebriefing n=5 - Debriefing n=6	learning formats other than virtual reality simulations, or no interventions	Cinahl, Cochrane Library, PubMed, Embase-Ovid,Web of Science, Scopus,ProQuest Dissertations & Theses Global, APA PsycArticles,Research Information Sharing Service, from from June 23, 2023, to July 31, 2023	2020-2023	8	Inclusion: - Articles published in Korean or English - Nursing students - VR, AR, MR, extended reality, metaverse - Traditional learning or no intervention - Communication skills (primary outcome), self-efficacy, critical thinking, teamwork, learning satisfaction, confidence - Studies that report the number of participants, mean, and standard deviation - Randomized controlled trials (RCTs) and a …	Republic of Korea	Critical low (AMSTAR 2)	Random-effects meta-analysis with subgroup and meta-regression analyses	Quantitativ	Hedge’s g	Effect-sizes of primary studies	probably contextual factors regarding geographical, cultural and healthcare environmental factors	Moderate effect in favorur of VRS learning (Hedge’s g of 0.44 (95% CI: 0.13- 0.75))	I2= 82.2%
Richardson et al. (34) Systematic narrative review intended to assess and analyse the implementation of virtual patients in pharmaceutical education.	Pharmacy, mixed health care students, medical dentristy students n= 681	Establish and assess literature about the utilization of virtual patients in pharmacy for the enhancement of communication and counselling skills among students, preregistration pharmacists, and registered pharmacists.	Computer-Simulated Community Pharmacy (Unity3D) - Simulates a community pharmacy environment - Users select patient dialogues - Generates text responses and animations TheraSim - Web-based simulation for healthcare professionals - Clinical training tool - Identify and resolve drug therapy problems - Includes patient education SIMmersion-Based VR Simulation - Stand-alone, off-the-shelf virtual rea…	Studies with or without comparison	EBSCO was utilized to access electronic databases, including MEDLINE, Allied and Complementary Medicine Database, Cumulative Index of Nursing and Allied Health Literature, and Education Resources Information Centre.	2009-2017	7	Inclusion: - Pharmacists, pre-registration pharmacists and pharmacy students - Studies employing virtual patients, defined as interactive computer simulations of programmed patients (or avatars) designed for authentic clinical scenarios, seeks to improve medical training, education, or assessment that responds to learner decisions, or that instructs, cultivates, or contributes to counselling, com…	United Kingdom	Critical low (AMSTAR 2)	Thematic analysis	Narrativ	NR	- Predominantly utilised pre/post designs, encompassing knowledge quizzes, self-reported confidence assessments, and Likert-scale questionnaires. - Certain research utilised randomised controlled trials (RCTs), observational techniques, and qualitative components (e.g., workshop reflections) to assess performance. Nevertheless, the majority of methodologies emphasised perceived communication skil…	- Technical issues (e.g. glitches, navigation problems) negatively affected performance and use in several studies. - Accessibility (e.g. browser-based, low system requirements) was positively noted. - VPs were generally seen as more engaging than paper-based alternatives. - Even well-designed tools can lose perceived value over time (e.g. Taglieri et al). - Usability must be assessed from the le…	- VPs promote experiential learning by allowing students to make decisions and experience consequences - Students identified with the virtual patient and felt responsible for outcomes. - Design features (e.g. time limits, structure of tasks) strongly influence learning effectiveness. - Confidence increased significantly immediately after VP use - Long-term confidence outcomes were mixed and somet…	nr
Phanudulkitti et al. (35) A systematic evaluation examining the application of virtual patients and computer-based simulations to improve experiential learning in undergraduate pharmacy education.	Students: 1056 Pharmacy preregistration- year 1-5 of studying 29 medical students 3 years of studying	Aggregate evidence regarding virtual patients in pharmacy experiential education and assess their impact on student learning outcomes (knowledge, skills, satisfaction, confidence, enjoyment, engagement).	- VPs were created to simulate patient interactions for the practice of professional skills, including preparation for clinical assessments. - Virtual patients (VPs) were mostly integrated into existing learning activities . Four of the programs used in primary studies that met the inclusion criteria of this review were reported as free of cost: - vpSim (n = 1) - Monash OSCE Virtual Experience (M…	NR	Including Ovid MEDLINE, EMBASE, Scopus, Education Resources Information Center (ERIC), and Education Abstracts	2011-2021	6	Inclusion: - Studies published before 24.09.2021 - Experimental, quasi experimental, observational, descriptive, qualitative, mixed-methods, cohort, cross-sectional, case-control studies, case reports, case studies, or randomized controlled - Articles published in English - Evaluating effectiveness or benefits of Vps in helping students pharmacist in learning and skills Exclusion: - Studies conta…	Thailand	Critical low (AMSTAR 2)	nr	Narrativ	NR	Self-reported student perceptions, course evaluations, or general feedback	Institutional ressources and financial considerations	Results indicate an improvement in students’ communication skills, confidence, and ability to conduct patient consultations following virtual patient interventions.	nr
Dong et al. (36) A systematic evaluation summarizing the attributes and instructional design of virtual reality-based nurse communication education, with the objective of identifying prevalent beneficial elements to guide future educational practices.	Population: Nursing Students (N=1360) all undergratudae learning stages	Summarize the attributes and design of VR-based nurse communication education and identify common elements of effective research to guide future educational initiatives.	- The majority of the research (n=9) employed mobile applications or network platforms to teach communication. - Additionally, (n=5) integrated a conferencing platform to present the scenes and provide a summary of the outcomes prior to and during the instruction. - The intervention scenes predominantly comprised patient condition assessments (7/13), succeeded by the communication of unfavourable…	traditional teaching methods, such as classroom teaching	Cochrane Library, Embase, CINAHL, Web of Science, PubMed, WanFang, Vip, and CNKI databases December 2021, and an updated search was performed in June 2023	2011-2018	10	Inclusion: -published before june 2023 - nursing students - Education based on VR technologies that contains the elements of virtual wards and virtual patients - Traditional teaching was determined as a comparator. - Studies contain information about communication ability, cognition, and skills - Qualitative, quantitative, and mixed-method studies were examined Exclusion: - No English or Chinese …	Republic of China	Critical low (AMSTAR 2)	Descriptive analysis through tabulation of extracted data	Narrativ	NR	- Q5Professional evaluation scales (n=2) - Subscales, partial assessment enquiriese for communication evaluation (n=7) - Open response questions, focus group talks or individual interviews (n=7)	- VR-based teaching inherently lacks authentic situational sensations and is constrained in its conveyance of nonverbal and bodily language cues. - Unknown effect on clinical performance, such as language expression and response in real clinical environments - Use of communication strategies (more systematic learning) - Combination of teaching methods (timely feedback, reflection reports) - VR sh…	- The utilisation of virtual reality yields markedly superior communication outcomes compared to alternative methods or pre-post research (n = 3). - It yields markedly superior communication outcomes without comparative analysis (n = 4) and leads to no clear differences or even lower communication results than other approaches or prepost trials (n = 3)	nr
Rodda et al. (37) This systematic review aimed to assess the existing literature on the application of virtual reality and augmented reality simulations in undergraduate medical education within the field of psychiatry.	Medical students : 1243 (2-5Y) Pharmacy: 271 (4.Year)	Examine existing evidence about virtual reality (VR) and augmented reality (AR) in undergraduate psychiatry education, including explored conditions and their influence on educational outcomes (reactions, knowledge, skills, attitudes, behaviors, and patient impact).	Studies employed immersive VR headsets to replicate symptoms or experiences associated with illnesses including dementia and schizophrenia. augmented reality to replicate the positive symptoms of schizophrenia. virtual patients (VPs) that replied to predetermined student enquiries from a programmed response database, frequently offering automated feedback. The response types comprised video clips…	nr	Three electronic databases (EMBASE, MEDLINE, and PsychInfo) were queried from their establishment until 3 September 2024.	1993-2023	19	- Studies including undergraduate medical students - Studies using VR or AR for educational purposesa - Primary studies of any design - Published in peer-reviewed journal - Studies of education regarding mental health - Relevant ethical approval obtained Exclusion: - Studies in languages other than English - Editorials, conference abstracts and opinion pieces - Data from presentations, conference…	United Kingdom	Critical low (AMSTAR 2)	Desriptive/thematic	Narrativ	NR	MERSQI 8.5	Student experiences with VR and AR were the most frequently reported outcomes. One study found that over 85% of medical students reported emotional impact, improved understanding of dementia, and changes in patient approach after a VR simulation. Another showed an increase in perceived usefulness of web resources (from 20% to 76%). Perceptions of realism varied: some students found VP interaction…		nr
Alsharari et al. (38) A systematic evaluation assessing the efficacy of virtual learning technologies—comprising virtual, augmented, mixed, and immersive reality—in nursing education, with an emphasis on essential professional competences, problem-solving, the nursing process, and communication skills.	nursing Students:367	Evaluate the efficacy of virtual simulation on communication and problem-solving (primary), as well as professional competencies and the nursing process (secondary).	Simulation-based education,Clinical reasoning,Practicum with AEMR ( Academic Electronic Medical Record),Active role Communication skills Scenario game-based learning Learning performance Communication Collaboration Critical thinking Complex problem solving Creative thinking Computational thinking Clinical competence Nursing process Direct nursing intervention Psychosocial nursing Education for pa…	Conventional pre-clinical practice orientation, Usual care, Conventional Practicum, Observers’ role,Adopted video-based learning	Four electronic databases were queried: PubMed, Embase, PsycINFO, and Web of Science. The search period extended from start until 30 April 2024.	2012-2024	5	Study type: the study included original articles from experimental research such as the randomized controlled trials, and non- randomized controlled trials (e.g., quasi-experimental studies with two or more groups (pre-/post-test) published in the English from inception to 2024.The population included nursing students enrolled at University/College. Interventions included e-materials and virtual …	Saudi Arabia	Critical low (AMSTAR 2)	Cochrane-guided quantitative analysis using random-effects model (RevMan 5.3); heterogeneity (I²) and sensitivity analyses conducted	Quantitative synthesis (non-meta-analytic)	Hedges’ g (95% CI) — effect sizes classified as trivial (<0.1), small (0.1–0.3), moderate (0.3–0.5), and large (>0.5)	Communication skill tool Clinical competence tool effect sizes Critical thinking Disposition Scale Self-developed scale Nursing core competencies measurement tool, Academic self-efficacy tool Problem solving skills tool STAI = State-Trait Anxiety Inventory for Adults; SCLS = Student Satisfaction and Self-Confidence in Learning Scale; SLEI = Simulation Learning Effectiveness Inventory Communicatio…	NR	Simulation led to an improvement in communication skills with small to large changes with an effect size of 0.4–0.7 There was also evidence of a small improvement (0.2) in communication with patients or clear communication about the patient’s condition (0.1)	nr
Chae et al. (39) A systematic review sought to locate, evaluate, and integrate available data about virtual simulation to enhance the cultural competency of pre-licensure and licensed healthcare professionals.	Second year medical students (n=421)- age 25.5 Senior nursing students (third year) (n=51)- age 20-29 Final year physiotherapy students (n=309) age 18-27 second degree nursing students (n=136) first year nursing students (n=28) age 24 second year med.students (n=10) age 24 Second year nursing students (n=460) age 27.5 First semester nursing students (n=342) age 24.4 Second year osteopathic medici…	Assess, evaluate, and integrate evidence about the efficacy of cultural competence virtual simulation for pre-licensure and licensed healthcare professionals.	- Studies vary in time, frequency, prebriefing, and debriefing - Focused on the affective dimension (cultural awareness, empathy, and attitude) and practical communicational skills - Content was associated to Culture, Respect, Assess and Sensitivity and Self-awareness, Humility, Set-up, Perception, Invitation, Knowledge, Emotion, Summary,” “Team Strategies and Tools to Enhance Performance and Pat…	other simulation subjects -no simulation	PubMed, CIHNAL, EMBASE, Ovid MEDLINE, and Korean databases (KISS, RISS, and DBpia) from September 10, 2029 - The reference lists of the identified studies were reviewed manually to find additional eligible studies.	2012-2018	8	Licensed health professionals or students (nurses, physicians, or other health professionals) - VS was employed to enable cultural competence - Control groups attend to other simulation subjects or no simulation - Outcomes were overall or subdomain of cultural competence, the confidence of cultural competence - Studies followed a treatment-control design, including randomized controlled trials (R…	South Korea	Critical low (AMSTAR 2)	Qualitative analysis based on the Johns Hopkins Nursing Evidence-Based Practice model	Narrativ	NR	Measurements: - Cultural Competence Questionnaire - Campinha-Bacote Cultural Competency - Care plan rubric - Modified Clinical Cultural Competence Questionnaire. - Attitude Toward Poverty Scale - Comprehensive State Empathy Scale - Modified KiersmaChen Empathy Scale - Questions about awareness developed by the authors. - Simulation activity performance scores - Transcultural Self-efficacy Tool - …	NR	Students showed improved empathy towards culturally diverse patients and enhanced practical communication skills compared to the control group.	Studies had high heterogeneity in terms of modality, scenario context, time, frequency, learning environment measurement tools, and composition
