# Supplementary material for: Teaching clinical communication skills through virtual patient-based learning: an umbrella review of systematic reviews
Source: BMC Med Educ. 2026 May 13;26:1082. doi: 10.1186/s12909-026-09374-6 (PMC13339519; doi:10.1186/s12909-026-09374-6)
Supplement: Supplementary file 3 — Supplementary Material 3. [file 12909_2026_9374_MOESM3_ESM.xlsx]

## Sheet: Screening
Studien-Key	Author	Study title	Journal	Review Design	Justification for exclusion	Reviewer 1 Desicion	Reviewer 2 Desicion
BDDU7WVH	Marie-Aude Piot1,2,3,4; Agnès Dechartres5 ; Chris Attoe6 ; Fabrice Jollant2,7,8,9; Cédric Lemogne2,10,11; Carine Layat Burn12,13; Jan-Joost Rethans14 ;Daphne Michelet4,15; Sean Cross6 ;Gregoire Billon6; Gilles Guerrier2,4,16 ; Antoine Tesniere2,4; Bruno Falissard1,1, 2020	Simulation in psychiatry for medical doctors: A systematic review and meta-analysis	MEDICAL EDUCATION	SR and meta-analysis	Insufficient relevant Primary studies	Inclusion	Exclusion
P3NB58QK	Dale MacLaine, Thomas; Lowe, Nicholas; Dale, Jeremy	The use of simulation in medical student education on the topic of breaking bad news: A systematic review.	Patient Education & Counseling	SR	Insufficient relevant Primary studies	Inclusion	Exclusion
IB8UV9QV	Jihyun Lee; Hyungsin Kim; Kwan Hoon Kim; Daeun Jung; Tanisha Jowsey; Craig S. Webster	Effective virtual patient simulators for medical communication training: A systematic review	MEDICAL EDUCATION	SR		Inclusion	Inclusion
C5W3CVK8	Sezgin, Merve Gozde; Bektas, Hicran, 2023	Effectiveness of interprofessional simulation-based education programs to improve teamwork and communication for students in the healthcare profession: A systematic review and meta-analysis of randomized controlled trials.	Nurse Education Today	SR	No clinical communication	Exclusion	Exclusion
XAGV86AV	Jensen, R.A.A., Musaeus, P. & Pedersen, K. , 2023	Virtual patients in undergraduate psychiatry education: a systematic review and synthesis	Advances in Health Sciences Education	SR		Inclusion	Inclusion
DXTRDBMG	Chamipa Phanudulkitti a,*, Surangkana Puengrung b, Rittnarong Meepong a, Kathryn Vanderboll c, Karen Bell Farris d, Sarah E. Vordenberg d, 2023	A systematic review on the use of virtual patient and computer-based simulation for experiential pharmacy education	Exploratory Research in Clinical and Social Pharmacy	SR		Inclusion	Inclusion
PAYIAM5P	Mi-Kyoung Cho1 and Mi Young Kim, 2024	The effect of virtual reality simulation on nursing students' communication skills: a systematic review and meta-analysis	Front. Psychiatry	SR and meta-analysis		Inclusion	Inclusion
29Y9FKNC	Yueyang Dong MSc, Juanjuan Sun MSc, Meng He MSc, Xiangning Zhu MSc, Shuang Zhang MSc, Wenxia Wang PhD, Shuyan Fang PhD, Haitao Song Bachelor of Nursing, Jiao Sun PhD, 2024	Application of virtual reality in nursing communication education: A systematic review	Journal of Professional Nursing	SR		Inclusion	Inclusion
M4KN8DDF	Grace V Ryan, MUDR, MRCPI; Shauna Callaghan, RM, PhD; Anthony Rafferty, BSc, MBChB, PhD; Mary F Higgins, MSc, MD, MRCPI, MRCOG; Eleni Mangina, HDip, MSc, PhD; Fionnuala McAuliffe, MD, MRCPI, MRCOG	Learning Outcomes of Immersive Technologies in Health Care Student Education: Systematic Review of the Literature	JOURNAL OF MEDICAL INTERNET RESEARCH	SR	No clinical communication	Exclusion	Exclusion
FHG8R98C	Lin Hui Quek a, Apphia J.Q. Tan a, Marcia J.J. Sim b, Jeanette Ignacio a, Nicole Harder c, Aimee Lamb d, Wei Ling Chua a, Siew Tiang Lau a, Sok Ying Liaw a	Educational escape rooms for healthcare students: A systematic review	Nurse Education Today	SR	No clinical communication	Exclusion	Exclusion
J7BK5JLT	Panpan Huai a , Yao Li a , Xiaomeng Wang b, Linghui Zhang a, Nan Liu a, Hui Yang c	The effectiveness of virtual reality technology in student nurse education: A systematic review and meta-analysis	Nurse Education Today	SR		Inclusion	Inclusion
ZBKPMEPV	Cant, Robyn PhD, MHlthSc; Ryan, Colleen RN, PhD, MHPE, SFHEA; Kelly, Michelle A. RN, PhD, MN, BSc	Use and Effectiveness of Virtual Simulations in Nursing Student Education: An Umbrella Review	CIN: Computers, Informatics, Nursing	SR		Inclusion	Inclusion
IUWDAIY9	Minna Hökkä, Mira Rajala, Pirjo Kaakinen, Juho T. Lehto and Hanna-Mari Pesonen	The effect of teaching methods in palliative care education for undergraduate nursing and medical students: a systematic review.	International Journal of Palliative Nursing	SR	Technology criterion not met	Exclusion	Exclusion
7RUTWZ4X	Duckhee Chae Ph.D, RN a, Jae Yong Yoo Ph.D, RN b, Jaseon Kim MSN a, Jeeheon Ryu Ph.D c	Effectiveness of Virtual Simulation to Enhance Cultural Competence in Pre-licensure and Licensed Health Professionals: A Systematic Review	Clinical Simulation in Nursing	SR		Inclusion	Inclusion
upSear2	Joanne Rodda,Hanna Mansi, Jacob Fernando‐Sayers,Sharna Bennett, Sukhi Shergill	Virtual and Augmented Reality in Undergraduate Medical Education in Psychiatry: A Systematic Review	THE CLINICAL TEACHER	SR		Inclusion	Inclusion
upSear3	Andrea N. Neher, Florian Bühlmann, Martin Müller, Christoph Berendonk, Thomas C. Sauter & Tanja Birrenbach	Virtual reality for assessment in undergraduate nursing and medical education – a systematic review	BMC Medical Education	SR	No clinical communication	Exclusion	Exclusion
upSear1	Abdalkarem Fedgash Alsharari1* , Dauda Salihu2 and Farhan Faleh Alshammari	Effectiveness of virtual clinical learning in nursing education: a systematic review	BMC Nursing	SR		Inclusion	Inclusion
upSear4	Qian Li a b,Hui Duan a, Xinxu Zhou a, Xiaobin Sun a, Lan Tao a, Xiuying Lu c	The use of metaverse in medical education: A systematic review	Clinical Medicine	SR	Insufficient relevant Primary studies	Exclusion	Exclusion
upSearc5	J. Gårdlinga jenny.gardling@med.lu.se ∙ C. Viseua ∙ E. Hettingera ∙ P. Jildenståla,b,c,d,e,f ∙ A. Augustinssona	The effects of virtual reality (VR) on clinical skills training in undergraduate radiography education: A systematic review	Radiography	SR	No clinical communication	Exclusion	Exclusion
HBSC (Handsearch)	Richardson, C. L., White, S., & Chapman, S. (2020).	Virtual patient technology to educate pharmacists and pharmacy students on patient communication: A systematic review. BMJ Simulation and Technology Enhanced Learning, 6(6), 332–338. https://doi.org/10.1136/bmjstel-2019-000514	BMJ Simulation & Technology Enhanced Learning	SR		Inclusion
